# Supplementary material
Source: PubMed Central journal article supplement (PMC4426410)
Supplement: pnas.201503376SI.pdf [file pnas.201503376SI.pdf]

# Supporting Information

Skelton et al. 10.1073/pnas.1503376112

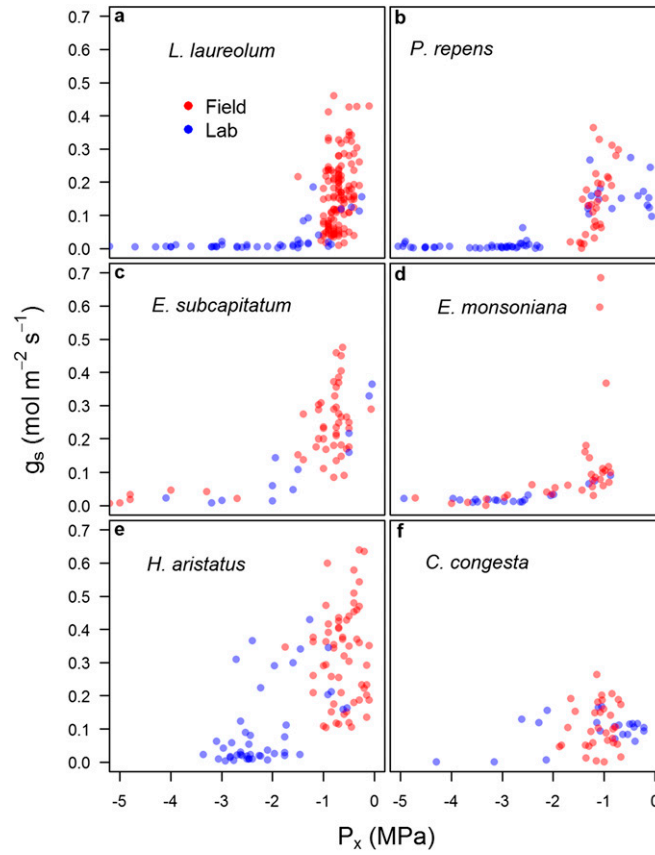

**Fig. S1.** Response of  $g_s$  to changes in  $P_x$  for six species obtained from long-term field studies (red) or laboratory dry-downs (blue). The full names for all species in A–F are shown in Table S1.

**Table S1. List of species for which the P<sub>50</sub> has been examined and the study in which it was reported**

| Family       | Species                                                                                                                                                                                                                                                                                               |
|--------------|-------------------------------------------------------------------------------------------------------------------------------------------------------------------------------------------------------------------------------------------------------------------------------------------------------|
| Asteraceae   | <i>Metalasia densa</i> (Lam.) P. O. Karis (1)<br><i>Osmitopsis asteriscoides</i> (P. J. Bergius) Less (2)                                                                                                                                                                                             |
| Bruniaceae   | <i>Brunia alopecuroides</i> Brongn (2)                                                                                                                                                                                                                                                                |
| Cupressaceae | <i>Juniperus osteosperma</i> (Torr.) Little (3)                                                                                                                                                                                                                                                       |
| Ericaceae    | <i>Erica plukenetii</i> E. G. H. Oliv. and I. M. Oliv (1)<br><i>Erica subcapitata</i> (N. E. Br.) E. G. H. Oliv<br><i>Erica vestita</i> Thunb (1)<br><i>Erica monsoniana</i> L. f. (4)                                                                                                                |
| Fabaceae     | <i>Aspalathus hirta</i> E. Mey (1)<br><i>Aspalathus pachyloba</i> Benth (1)                                                                                                                                                                                                                           |
| Pinaceae     | <i>Pinus edulis</i> Engelm (3)                                                                                                                                                                                                                                                                        |
| Proteaceae   | <i>Leucadendron laureolum</i> (Lam.) Fourc (1)<br><i>Leucadendron salignum</i> P. J. Bergius (1)<br><i>Leucadendron salicifolium</i> (Salisb.) I. Williams (2)<br><i>Mimetes cucullatus</i> (L.) R. Br (2)<br><i>Mimetes hirtus</i> (L.) Salisb. ex Knight (2)<br><i>Protea repens</i> (L.) L. (1, 4) |
| Restionaceae | <i>Hypodiscus aristatus</i> (Thunb.) C. Krauss<br><i>Cannomois congesta</i> Mast (4)                                                                                                                                                                                                                  |
| Rosaceae     | <i>Cliffortia ruscifolia</i> L. (1)                                                                                                                                                                                                                                                                   |

- Jacobsen AL, Esler KJ, Pratt RB, Ewers FW (2009) Water stress tolerance of shrubs in Mediterranean-type climate regions: Convergence of fynbos and succulent karoo communities with California shrub communities. *Am J Bot* 96(8):1445–1453.
- Aston T (2007) Geohydrological characteristics of Table Mountain Group aquifer-fed seeps and the plant ecophysiological consequences. M.Sc. dissertation (University of Cape Town, Cape Town, South Africa).
- Linton MJ, Sperry JS, Williams DG (1998) Limits to water transport in *Juniperus osteosperma* and *Pinus edulis*: implications for drought tolerance and regulation of transpiration. *Funct Eco* 12(6):906–911.
- Skelton RP (2014) The role of hydraulic strategies in understanding the response of fynbos to drought. PhD dissertation (University of Cape Town, Cape Town, South Africa).
